# Supplementary material for: Supramolecular chirogenesis in zinc porphyrins by enantiopure hemicucurbit[n]urils (n = 6, 8)
Source: Royal Society of Chemistry journal article supplement (doi:10.1039/c9cc07150d), 2019-01-01
Supplement: c9cc07150d4.xlsx [file c9cc07150d4.xlsx]

## Sheet: ZnTPP, cycHC8 - NMR1
			H1			H2
	[cycHC8]	[ZnTPP]	exp	calc		exp	calc		ratio
0	0	0.004963	8.8966	8.8966		7.7076	7.7076		0
1	0.000102152	0.004963	8.8898	8.89021		7.7036	7.70378		0.0205827
2	0.000202412	0.004963	8.8834	8.88422		7.6999	7.70019		0.0407842
3	0.000300833	0.004963	8.8775	8.87859		7.6964	7.69684		0.0606151
4	0.000397464	0.004963	8.8723	8.87332		7.6933	7.6937		0.0800854
5	0.000492354	0.004963	8.8674	8.86839		7.6904	7.69079		0.0992049
6	0.00058555	0.004963	8.8628	8.86378		7.6876	7.68808		0.117983
7	0.000677096	0.004963	8.8585	8.8595		7.685	7.68557		0.136429
8	0.000784835	0.004963	8.8539	8.85474		7.6826	7.68281		0.158137
9	0.000890333	0.004963	8.8495	8.8504		7.6801	7.68031		0.179394
10	0.00099366	0.004963	8.8457	8.84644		7.678	7.67806		0.200213
11	0.00109488	0.004963	8.8423	8.84284		7.6761	7.67604		0.220609
12	0.00124291	0.004963	8.8378	8.83806		7.6736	7.67342		0.250434
13	0.00149535	0.004963	8.8313	8.8312		7.6701	7.66978		0.301298
14	0.00173496	0.004963	8.8266	8.82608		7.6677	7.66721		0.349579
15	0.00197657	0.004963	8.8227	8.82211		7.6657	7.66535		0.398261
16	0.00221893	0.004963	8.8198	8.81912		7.6645	7.66406		0.447093
17	0.00247327	0.004963	8.8175	8.81684		7.6637	7.66317		0.498341
18	0.00299459	0.004963	8.8144	8.81397		7.6626	7.66227		0.603383
19	0.00350329	0.004963	8.8125	8.81251		7.6621	7.66203		0.705881
20	0.00399249	0.004963	8.8117	8.81172		7.6621	7.66204		0.80445
21	0.00449355	0.004963	8.8111	8.81124		7.6622	7.66216		0.90541
22	0.00498868	0.004963	8.8107	8.81094		7.6623	7.66232		1.00517
23	0.00573471	0.004963	8.8103	8.81067		7.6623	7.66258		1.15549
24	0.00645687	0.004963	8.8101	8.81051		7.6625	7.66281		1.301
25	0.00745096	0.004963	8.8098	8.81038		7.6624	7.6631		1.5013
26	0.0080695	0.004963	8.8097	8.81033		7.6626	7.66325		1.62593
Comment 1: chemical shifts of signal H1 from titrations "ZnTPP, cycHC8 - NMR1"; "ZnTPP, cycHC8 - NMR2" and "ZnTPP, cycHC8 - NMR3" were combined and used together during the data analysis to obtain more stable fit. This approach was giving better result than global fit of multiple signals from one NMR titration therefore the results gained from different signals vary.
Comment 2: chemical shifts of signal H2 from titrations "ZnTPP, cycHC8 - NMR1" and "ZnTPP, cycHC8 - NMR2" were combined and used together during the data analysis to obtain more stable fit. This approach was giving better result than global fit of multiple signals from one NMR titration therefore the results gained from different signals vary.
		Results for H1:	δ(G)	8.893	ppm	Results for H2:	δ(G)	7.7067	ppm
			Δδ(G)	0	ppm		Δδ(G)	0	ppm
			δ(HG)	8.8101	ppm		δ(HG)	7.6661	ppm
			Δδ(HG)	0.0004	ppm		Δδ(HG)	0.0004	ppm
			δ(HG2)	8.8022	ppm		δ(HG2)	7.6564	ppm
			Δδ(HG2)	0.001	ppm		Δδ(HG2)	0.0017	ppm
			δ(HG3)	8.55	ppm		δ(HG3)	7.57	ppm
			Δδ(HG3)	0.11	ppm		Δδ(HG3)	0.11	ppm
			K1	1890	M-1		K1	1700	M-1
			ΔK1	60	M-1		ΔK1	300	M-1
			K2	1100	M-1		K2	1040	M-1
			ΔK2	80	M-1		ΔK2	350	M-1
			K3	50	M-1		K3	110	M-1
			ΔK3	25	M-1		ΔK3	80	M-1

## Sheet: ZnTPP, cycHC8 - NMR2
			H1			H2
	[cycHC8]	[ZnTPP]	exp	calc		exp	calc		ratio
0	0	0.00088281	8.893	8.893		7.7067	7.7067		0
1	8.75622e-05	0.00088281	8.8824	8.8824		7.701	7.70097		0.0991858
2	0.000175862	0.00088281	8.8735	8.87342		7.6962	7.69622		0.199207
3	0.000264833	0.00088281	8.866	8.86589		7.6925	7.69232		0.299989
4	0.000352391	0.00088281	8.8596	8.85973		7.6891	7.68918		0.399169
5	0.000440555	0.00088281	8.8544	8.85458		7.6865	7.68658		0.499037
6	0.000529265	0.00088281	8.8499	8.85025		7.6842	7.68443		0.599523
7	0.000618458	0.00088281	8.8461	8.8466		7.6821	7.68263		0.700556
8	0.000706185	0.00088281	8.843	8.84356		7.6807	7.68114		0.799928
9	0.00079434	0.00088281	8.8402	8.84095		7.6791	7.67987		0.899785
10	0.000882867	0.00088281	8.8381	8.83869		7.6785	7.67878		1.00006
11	0.00106258	0.00088281	8.8344	8.83497		7.6761	7.677		1.20364
12	0.00123619	0.00088281	8.8318	8.83219		7.6756	7.67568		1.40029
13	0.00140401	0.00088281	8.8297	8.83003		7.6745	7.67466		1.59038
14	0.00175416	0.00088281	8.8269	8.82666		7.6738	7.6731		1.98702
15	0.00219349	0.00088281	8.8242	8.82378		7.6726	7.67179		2.48467
16	0.00263223	0.00088281	8.8223	8.82176		7.6718	7.67088		2.98165
17	0.00307638	0.00088281	8.8209	8.82025		7.6711	7.67022		3.48476
18	0.00351815	0.00088281	8.8199	8.8191		7.6706	7.66971		3.98517
19	0.00396042	0.00088281	8.8189	8.81819		7.67	7.66932		4.48615
20	0.00438734	0.00088281	8.818	8.81747		7.6695	7.66901		4.96974
21	0.00529506	0.00088281	8.8167	8.8163		7.6689	7.66852		5.99796
22	0.00617451	0.00088281	8.8156	8.81548		7.6681	7.66818		6.99415
23	0.0070519	0.00088281	8.8146	8.81485		7.6674	7.66792		7.98801
24	0.0079378	0.00088281	8.8138	8.81435		7.6669	7.66771		8.99151
25	0.00855534	0.00088281	8.8134	8.81406		7.6666	7.6676		9.69103
Comment 1: chemical shifts of signal H1 from titrations "ZnTPP, cycHC8 - NMR1"; "ZnTPP, cycHC8 - NMR2" and "ZnTPP, cycHC8 - NMR3" were combined and used together during the data analysis to obtain more stable fit. This approach was giving better result than global fit of multiple signals from one NMR titration therefore the results gained from different signals vary.
Comment 2: chemical shifts of signal H2 from titrations "ZnTPP, cycHC8 - NMR1" and "ZnTPP, cycHC8 - NMR2" were combined and used together during the data analysis to obtain more stable fit. This approach was giving better result than global fit of multiple signals from one NMR titration therefore the results gained from different signals vary.
		Results for H1:	δ(G)	8.893	ppm	Results for H2:	δ(G)	7.7067	ppm
			Δδ(G)	0	ppm		Δδ(G)	0	ppm
			δ(HG)	8.8101	ppm		δ(HG)	7.6661	ppm
			Δδ(HG)	0.0004	ppm		Δδ(HG)	0.0004	ppm
			δ(HG2)	8.8022	ppm		δ(HG2)	7.6564	ppm
			Δδ(HG2)	0.001	ppm		Δδ(HG2)	0.0017	ppm
			δ(HG3)	8.55	ppm		δ(HG3)	7.57	ppm
			Δδ(HG3)	0.11	ppm		Δδ(HG3)	0.11	ppm
			K1	1890	M-1		K1	1700	M-1
			ΔK1	60	M-1		ΔK1	300	M-1
			K2	1100	M-1		K2	1040	M-1
			ΔK2	80	M-1		ΔK2	350	M-1
			K3	50	M-1		K3	110	M-1
			ΔK3	25	M-1		ΔK3	80	M-1

## Sheet: ZnTPP, cycHC8 - NMR3
concentrations				H1				H1
[cycHC8]	[ZnTPP]	CH1	CH2	Hpor	oHph	CH1 Fit	CH2 Fit	Hpor Fit
		cycHC8	cycHC8	ZnTPP	ZnTPP	cycHC8	cycHC8	ZnTPP	ratio
0.00060727	0	4.693	4.5122			4.693	4.5122		0
0.00060727	0.000123632	4.5863	4.3769	8.8487	8.1059	4.58273	4.3727	8.84875	0.203586
0.00060727	0.000241897	4.4833	4.2467	8.8484	8.1049	4.48098	4.24394	8.84826	0.398335
0.00060727	0.000364357	4.3807	4.1164	8.8481	8.1038	4.37949	4.11547	8.84794	0.599992
0.00060727	0.000490097	4.2794	3.9877	8.8479	8.1028	4.27937	3.9887	8.84775	0.807049
0.00060727	0.000609908	4.1875	3.8727	8.8479	8.1023	4.18779	3.87274	8.8477	1.00434
0.00060727	0.000732163	4.0971	3.7582	8.848	8.1018	4.09814	3.75923	8.84774	1.20566
0.00060727	0.000856099	4.0092	3.6466	8.848	8.1013	4.01112	3.64904	8.84787	1.40975
0.00060727	0.000973847	3.9306	3.5479	8.8482	8.1009	3.93197	3.54882	8.84807	1.60365
0.00060727	0.00109268	3.8554	3.4526	8.8484	8.1008	3.85547	3.45199	8.84832	1.79933
0.00060727	0.00121198	3.7818	3.3585	8.8486	8.1006	3.78201	3.359	8.84863	1.99579
0.00060727	0.00136151	3.6932	3.2482	8.849	8.1005	3.69449	3.24825	8.84908	2.24202
0.00060727	0.00150674	3.6148	3.1462	8.8495	8.1006	3.61415	3.1466	8.84956	2.48117
0.00060727	0.00164229	3.5435	3.0576	8.8499	8.1007	3.54312	3.05675	8.85005	2.70438
0.00060727	0.00176909	3.4809	2.9769	8.8503	8.1008	3.47997	2.97687	8.85053	2.91318
0.00060727	0.00197784	3.3833	2.8544	8.8512	8.1013	3.38254	2.85367	8.85135	3.25693
0.00060727	0.00218445	3.2947	2.743	8.8521	8.1019	3.29359	2.74119	8.85218	3.59717
0.00060727	0.00243678	3.1967	2.6176	8.8533	8.1028	3.19417	2.61546	8.8532	4.01268
0.00060727	0.00262495	3.1259	2.5289	8.8541	8.1035	3.12604	2.52929	8.85395	4.32253
0.00060727	0.00280486	3.0657	2.4527	8.8549	8.1042	3.06527	2.45242	8.85464	4.6188
0.00060727	0.00304245	2.9896	2.3563	8.8561	8.1052	2.99102	2.35845	8.85554	5.01004
0.00060727	0.00327873	2.9206	2.2709	8.8572	8.1063	2.92331	2.27272	8.85639	5.39913
0.00060727	0.00351851	2.8583	2.1923	8.8583	8.1073	2.86021	2.19277	8.85721	5.79398
0.00060727	0.00375868	2.8024	2.118	8.8592	8.1083	2.8021	2.11908	8.85799	6.18947
0.00060727	0.00400053	2.7493	2.0523	8.8603	8.1094	2.7482	2.05067	8.85874	6.58772
0.00060727	0.00416561	2.715	2.0078	8.8609	8.1101	2.71383	2.00701	8.85923	6.85956
Comment 1: every signal of cycHC8 was fitted separately
Comment 2: chemical shifts of ZnTPP signal H1 from titrations "ZnTPP, cycHC8 - NMR1"; "ZnTPP, cycHC8 - NMR2" and "ZnTPP, cycHC8 - NMR3" were combined and used together during the data analysis to obtain more stable fit. This approach was giving better result than global fit of multiple signals from one NMR titration therefore the results gained from different signals vary.
Results:		cycHC8 CH1	cycHC8 CH2		Results for ZnTPP H1:	δ(G)	8.893	ppm
	δ(HG3)	1.59	0.54	ppm		Δδ(G)	0	ppm
	∆δ(HG3)	0.08	0.09	ppm		δ(HG)	8.8101	ppm
	K1	1880	1840	M-1		Δδ(HG)	0.0004	ppm
	∆K1	110	100	M-1		δ(HG2)	8.8022	ppm
	K2	600	600	M-1		Δδ(HG2)	0.001	ppm
	∆K2	20	200	M-1		δ(HG3)	8.55	ppm
	K3	180	170	M-1		Δδ(HG3)	0.11	ppm
	∆K3	30	20	M-1		K1	1890	M-1
						ΔK1	60	M-1
						K2	1100	M-1
						ΔK2	80	M-1
						K3	50	M-1
						ΔK3	25	M-1

## Sheet: ZnTPP, cycHC8 - Abs1
concentrations
[ZnTPP]	[cycHC8]	419nm	425nm	419nm	425nm
		ZnTPP	ZnTPP	FIT	FIT								ratio
6.07673e-07	0	0.589127	0.230862	0.589127	0.230862								0
6.07673e-07	2.41363e-05	0.586627	0.228341	0.572128	0.249368								39.7192
6.07673e-07	5.5096e-05	0.564318	0.254622	0.552556	0.270676								90.6672
6.07673e-07	0.000104136	0.533002	0.289791	0.525777	0.29983								171.369
6.07673e-07	0.000194363	0.490224	0.337358	0.486637	0.342443								319.848
6.07673e-07	0.00030163	0.454457	0.379309	0.451816	0.380352								496.368
6.07673e-07	0.000422897	0.421882	0.413705	0.422381	0.412398								695.929
6.07673e-07	0.000777074	0.366398	0.473978	0.368848	0.470679								1278.77
6.07673e-07	0.00120987	0.331451	0.511331	0.333843	0.508789								1990.99
6.07673e-07	0.00157236	0.314659	0.529489	0.31587	0.528357								2587.5
6.07673e-07	0.00187706	0.303734	0.54231	0.305033	0.540155								3088.92
6.07673e-07	0.00222168	0.295029	0.550382	0.295718	0.550296								3656.04
Results:	A(HG)	0.232	0.62
	ΔA(HG)	0.003	0.003
	K1	2070	M-1
	ΔK1	20	M-1
	K2	900	M-1
	ΔK2	20	M-1
	K3	430	M-1
	ΔK3	120	M-1

## Sheet: ZnTPP, cycHC8 - Abs2
concentrations
[ZnTPP]	[cycHC8]	548nm	556nm	595nm	548nm	556nm	595nm
		ZnTPP	ZnTPP	ZnTPP	FIT	FIT	FIT						ratio
1.70889e-05	0	0.348018	0.212803	0.031607	0.348018	0.212803	0.031607						0
1.70889e-05	1.71991e-05	0.341254	0.215413	0.0338259	0.343314	0.216654	0.0346311						1.00645
1.70889e-05	3.42781e-05	0.33762	0.219363	0.0369427	0.33895	0.220226	0.0374368						2.00587
1.70889e-05	5.12383e-05	0.332672	0.221974	0.0395406	0.334891	0.223549	0.0400468						2.99834
1.70889e-05	6.80809e-05	0.32867	0.223948	0.04202	0.331105	0.226649	0.0424808						3.98393
1.70889e-05	8.4807e-05	0.324256	0.228458	0.0445472	0.327567	0.229546	0.044756						4.96271
1.70889e-05	0.000137019	0.314012	0.236597	0.0508146	0.317742	0.237589	0.051073						8.01802
1.70889e-05	0.000204021	0.303477	0.245355	0.0579223	0.307312	0.246127	0.0577788						11.9388
1.70889e-05	0.000271736	0.295212	0.253524	0.0636679	0.298647	0.253221	0.0633504						15.9013
1.70889e-05	0.000340023	0.291387	0.2604	0.0672308	0.291349	0.259196	0.0680429						19.8973
1.70889e-05	0.000425605	0.27987	0.265059	0.0722537	0.283748	0.265418	0.0729298						24.9054
1.70889e-05	0.000510351	0.27879	0.274077	0.0794891	0.277511	0.270524	0.0769404						29.8645
1.70889e-05	0.000596397	0.270391	0.275284	0.0799672	0.272179	0.27489	0.0803687						34.8998
1.70889e-05	0.000681276	0.266511	0.279468	0.0833496	0.26769	0.278564	0.0832544						39.8667
1.70889e-05	0.000853206	0.259955	0.28503	0.0872676	0.260346	0.284576	0.0879766						49.9276
1.70889e-05	0.00102435	0.254769	0.289421	0.0912079	0.254699	0.289199	0.0916074						59.9424
1.70889e-05	0.00119485	0.251216	0.29314	0.0940269	0.250219	0.292867	0.0944881						69.9198
1.70889e-05	0.00136756	0.249131	0.29641	0.0964762	0.246522	0.295893	0.0968648						80.0264
1.70889e-05	0.00170605	0.242844	0.300872	0.100288	0.24097	0.300439	0.100435						99.8343
1.70889e-05	0.00196494	0.240126	0.303634	0.10572	0.23776	0.303067	0.102499						114.983
1.70889e-05	0.00222007	0.236862	0.304201	0.103827	0.235198	0.305164	0.104146						129.913
1.70889e-05	0.00252601	0.232699	0.30385	0.104258	0.2327	0.307209	0.105752						147.816
Results:	A(HG)	0.2106	0.3252	0.12
	ΔA(HG)	0.0019	0.0019	0.0019
	K1	2070	M-1
	ΔK1	20	M-1
	K2	900	M-1
	ΔK2	20	M-1
	K3	430	M-1
	ΔK3	120	M-1

## Sheet: ZnTPP, cycHC8 - Abs3
concentrations
[ZnTPP]	[cycHC8]	470nm	480nm	574nm	596nm	610nm	470nm	480nm	574nm	596nm	610nm
		ZnTPP	ZnTPP	ZnTPP	ZnTPP	ZnTPP	FIT	FIT	FIT	FIT	FIT		ratio
0.000189623	0	0.329928	0.383307	0.471264	0.353227	0.0824478	0.329928	0.383307	0.471264	0.353227	0.0824478		0
0.000189623	3.26166e-05	0.325067	0.370705	0.492667	0.432924	0.0997116	0.321089	0.373329	0.489338	0.415376	0.0957313		0.172008
0.000189623	8.00202e-05	0.313792	0.358586	0.512246	0.50455	0.114277	0.309904	0.360703	0.51221	0.494071	0.11254		0.421996
0.000189623	0.000127508	0.303481	0.347163	0.528932	0.562396	0.127487	0.300313	0.349877	0.531823	0.561593	0.126954		0.67243
0.000189623	0.000175071	0.294328	0.337207	0.546807	0.621477	0.138307	0.292012	0.340506	0.548797	0.620057	0.13943		0.923257
0.000189623	0.000222699	0.285541	0.327879	0.559037	0.667824	0.148206	0.284767	0.332328	0.563612	0.671101	0.150318		1.17443
0.000189623	0.000270384	0.280935	0.323265	0.576803	0.719996	0.16098	0.278395	0.325135	0.576642	0.716004	0.159894		1.4259
0.000189623	0.000318116	0.273859	0.316274	0.587958	0.760526	0.169237	0.272752	0.318766	0.588181	0.755776	0.168374		1.67762
0.000189623	0.000365365	0.266379	0.308127	0.595031	0.790283	0.174716	0.267775	0.313148	0.598357	0.790859	0.175853		1.9268
0.000189623	0.000427623	0.261257	0.301522	0.606396	0.831887	0.182818	0.261989	0.306617	0.610188	0.831648	0.184547		2.25512
0.000189623	0.000489052	0.254942	0.295321	0.61669	0.864443	0.190008	0.256996	0.30098	0.620399	0.86686	0.192052		2.57908
0.000189623	0.000554683	0.250891	0.290823	0.626388	0.899483	0.197526	0.252305	0.295685	0.62999	0.899935	0.199101		2.92519
0.000189623	0.000619379	0.247794	0.286618	0.634181	0.927424	0.202561	0.248223	0.291078	0.638337	0.928722	0.205236		3.26637
0.000189623	0.000683161	0.244626	0.283384	0.642463	0.955204	0.208207	0.244639	0.287032	0.645666	0.953997	0.210622		3.60273
0.000189623	0.000746048	0.240854	0.279129	0.647681	0.975459	0.213264	0.241468	0.283452	0.652151	0.976363	0.215387		3.93438
0.000189623	0.000841093	0.236742	0.274536	0.657883	1.00601	0.219308	0.237245	0.278686	0.660785	1.00615	0.221733		4.4356
0.000189623	0.000934128	0.233606	0.271723	0.663748	1.02933	0.22602	0.23366	0.274638	0.668118	1.03144	0.227122		4.92624
0.000189623	0.00102972	0.230607	0.268807	0.671788	1.05305	0.229696	0.230435	0.270998	0.674712	1.05418	0.231968		5.43037
0.000189623	0.00112324	0.228504	0.266341	0.677644	1.07377	0.234457	0.227652	0.267857	0.680402	1.07381	0.23615		5.92356
0.000189623	0.00131275	0.223207	0.261487	0.690301	1.11143	0.241139	0.222903	0.262496	0.690112	1.10731	0.243287		6.92295
0.000189623	0.00150207	0.221445	0.259318	0.69633	1.13309	0.248468	0.219067	0.258167	0.697956	1.13437	0.249051		7.92134
0.000189623	0.00169257	0.218639	0.257528	0.70301	1.15112	0.253011	0.215884	0.254573	0.704466	1.15683	0.253836		8.926
0.000189623	0.00188352	0.216152	0.254164	0.707949	1.17204	0.256183	0.213209	0.251554	0.709935	1.1757	0.257855		9.93296
0.000189623	0.00245868	0.20931	0.248834	0.722056	1.21719	0.266674	0.207259	0.244838	0.722101	1.21767	0.266796		12.9662
0.000189623	0.00303497	0.204374	0.24564	0.732878	1.24561	0.274755	0.203257	0.240319	0.730286	1.24592	0.272812		16.0053
0.000189623	0.00378666	0.198574	0.241956	0.741922	1.271	0.280896	0.199666	0.236266	0.737629	1.27125	0.278209		19.9694
0.000189623	0.00473722	0.192457	0.238952	0.754028	1.29846	0.289735	0.19661	0.232817	0.743877	1.29282	0.2828		24.9823
0.000189623	0.00519437	0.190069	0.238114	0.76049	1.30595	0.290503	0.195506	0.23157	0.746135	1.30061	0.284459		27.3932
Results:	A(HG)	0.1829	0.2174	0.7718	1.389	0.3033
	ΔA(HG)	0.0015	0.0015	0.0016	0.003	0.0015
	K1	2070	M-1
	ΔK1	20	M-1
	K2	900	M-1
	ΔK2	20	M-1
	K3	430	M-1
	ΔK3	120	M-1

## Sheet: ZnTPP, cycHC8 - Abs4
concentrations
[ZnTPP]	[cycHC8]	419nm	425nm	419nm	425nm
		ZnTPP	ZnTPP	FIT	FIT								ratio
1.59738e-06	0	1.09487	0.447023	1.09	0.447								0
1.59738e-06	7.98098e-06	1.07691	0.43835	1.08	0.458								4.9963
1.59738e-06	2.38598e-05	1.05846	0.462755	1.06	0.478								14.9368
1.59738e-06	3.96286e-05	1.03975	0.485873	1.04	0.496								24.8085
1.59738e-06	7.0841e-05	1.0092	0.528384	1.01	0.53								44.3483
1.59738e-06	0.000102901	0.964351	0.551143	0.976	0.562								64.4185
1.59738e-06	0.000165671	0.914089	0.604318	0.922	0.614								103.714
1.59738e-06	0.000245881	0.863701	0.677695	0.866	0.667								153.928
1.59738e-06	0.000325528	0.813127	0.709632	0.822	0.71								203.789
1.59738e-06	0.000421062	0.772435	0.757085	0.779	0.751								263.596
1.59738e-06	0.000516598	0.7395	0.784197	0.745	0.784								323.403
1.59738e-06	0.000612846	0.704816	0.802046	0.716	0.812								383.657
1.59738e-06	0.000723623	0.679172	0.835929	0.688	0.838								453.007
1.59738e-06	0.000882998	0.652652	0.869942	0.657	0.869								552.779
1.59738e-06	0.00111869	0.62068	0.893533	0.621	0.903								700.33
1.59738e-06	0.00159731	0.582941	0.949695	0.574	0.948								999.959
1.59738e-06	0.00199827	0.561304	0.980198	0.549	0.973								1250.97
1.59738e-06	0.00239689	0.546835	0.996613	0.531	0.99								1500.52
Results:	A(HG)	0.417	1.099
	ΔA(HG)	0.003	0.003
	K1	2070	M-1
	ΔK1	20	M-1
	K2	900	M-1
	ΔK2	20	M-1
	K3	430	M-1
	ΔK3	120	M-1

## Sheet: ZnTPP, cycHC6 - NMR1
			H1			H2
	[cycHC6]	[ZnTPP]	exp	calc		exp	calc		ratio
0	0	0.00100751	8.8945	8.8945		7.7097	7.7097		0
1	9.99104e-05	0.00100751	8.8731	8.87304		7.7034	7.70359		0.099166
2	0.000199159	0.00100751	8.8564	8.85616		7.6987	7.69886		0.197675
3	0.000297753	0.00100751	8.8438	8.84348		7.6954	7.69536		0.295534
4	0.000395698	0.00100751	8.8345	8.83439		7.6928	7.69287		0.39275
5	0.000493	0.00100751	8.8282	8.82809		7.6911	7.69117		0.489327
6	0.000589667	0.00100751	8.824	8.82384		7.6902	7.69004		0.585274
7	0.000781117	0.00100751	8.8195	8.81915		7.6893	7.68891		0.775298
8	0.000970097	0.00100751	8.8177	8.81715		7.6891	7.68857		0.96287
9	0.00115665	0.00100751	8.817	8.81636		7.6893	7.68859		1.14804
10	0.00152268	0.00100751	8.8171	8.81619		7.6896	7.68897		1.51134
11	0.00170225	0.00100751	8.8173	8.81637		7.6899	7.68919		1.68956
12	0.00205468	0.00100751	8.8177	8.81687		7.6902	7.68961		2.03937
13	0.00256721	0.00100751	8.8184	8.81765		7.6906	7.69012		2.54808
14	0.00298021	0.00100751	8.8188	8.81821		7.6908	7.69044		2.95801
15	0.003538	0.00100751	8.8192	8.81887		7.6909	7.69079		3.51164
16	0.00407329	0.00100751	8.8194	8.81939		7.6908	7.69104		4.04294
17	0.00501217	0.00100751	8.8196	8.82012		7.6908	7.69138		4.97483
18	0.00607859	0.00100751	8.8196	8.82073		7.6906	7.69165		6.0333
Comment 1: chemical shifts of signal H1 from titrations "ZnTPP, cycHC6 - NMR1"; "ZnTPP, cycHC6 - NMR2" and "ZnTPP, cycHC6 - NMR3" were combined and used together during the data analysis to obtain more stable fit. This approach was giving better result than global fit of multiple signals from one NMR titration therefore the results gained from different signals vary.
Comment 2: chemical shifts of signal H2 from titrations "ZnTPP, cycHC6 - NMR1" and "ZnTPP, cycHC6 - NMR2" were combined and used together during the data analysis to obtain more stable fit. This approach was giving better result than global fit of multiple signals from one NMR titration therefore the results gained from different signals vary.
		Results for H1:	δ(G)	8.8945	ppm	Results for H2:	δ(G)	7.7067	ppm
			Δδ(G)	0	ppm		Δδ(G)	0	ppm
			δ(HG)	8.8244	ppm		δ(HG)	7.693	ppm
			Δδ(HG)	0.0004	ppm		Δδ(HG)	0.0009	ppm
			δ(HG2)	8.771	ppm		δ(HG2)	7.666	ppm
			Δδ(HG2)	0.004	ppm		Δδ(HG2)	0.014	ppm
			δ(HG3)	8.627	ppm		δ(HG3)	7.6	ppm
			Δδ(HG3)	0.014	ppm		Δδ(HG3)	0.3	ppm
			K1	5000	M-1		K1	5200	M-1
			ΔK1	200	M-1		ΔK1	2400	M-1
			K2	1900	M-1		K2	1200	M-1
			ΔK2	200	M-1		ΔK2	900	M-1
			K3	190	M-1		K3	250	M-1
			ΔK3	16	M-1		ΔK3	200	M-1

## Sheet: ZnTPP, cycHC6 - NMR2
			H1			H2
	[cycHC6]	[ZnTPP]	exp	calc		exp	calc		ratio
0	0	0.000936918	8.8919	8.8919		7.7085	7.7085		0
1	0.000100807	0.000936918	8.8712	8.87018		7.7025	7.70243		0.107594
2	0.000200946	0.000936918	8.855	8.85348		7.6979	7.69785		0.214476
3	0.000300424	0.000936918	8.8427	8.84129		7.6945	7.69455		0.320652
4	0.000399248	0.000936918	8.8338	8.83278		7.6921	7.69228		0.426129
5	0.000497424	0.000936918	8.8279	8.82705		7.6906	7.69078		0.530915
6	0.000594958	0.000936918	8.8239	8.82327		7.6896	7.68982		0.635016
7	0.000691857	0.000936918	8.8212	8.8208		7.6891	7.68925		0.738439
8	0.000788126	0.000936918	8.8195	8.8192		7.6888	7.68893		0.84119
9	0.000883773	0.000936918	8.8182	8.81817		7.6886	7.68877		0.943276
10	0.000931364	0.000936918	8.8175	8.8178		7.6885	7.68874		0.994072
11	0.000978802	0.000936918	8.8173	8.81751		7.6886	7.68872		1.0447
12	0.00102609	0.000936918	8.8169	8.81729		7.6885	7.68873		1.09517
13	0.00107322	0.000936918	8.8168	8.81711		7.6885	7.68874		1.14548
14	0.00116703	0.000936918	8.8166	8.81688		7.6887	7.68881		1.24561
15	0.00153635	0.000936918	8.8166	8.81682		7.689	7.68922		1.63979
16	0.00189643	0.000936918	8.8173	8.81725		7.6895	7.68966		2.02411
17	0.00233407	0.000936918	8.8178	8.81787		7.6897	7.69011		2.49122
Comment 1: chemical shifts of signal H1 from titrations "ZnTPP, cycHC6 - NMR1"; "ZnTPP, cycHC6 - NMR2" and "ZnTPP, cycHC6 - NMR3" were combined and used together during the data analysis to obtain more stable fit. This approach was giving better result than global fit of multiple signals from one NMR titration therefore the results gained from different signals vary.
Comment 2: chemical shifts of signal H2 from titrations "ZnTPP, cycHC6 - NMR1" and "ZnTPP, cycHC6 - NMR2" were combined and used together during the data analysis to obtain more stable fit. This approach was giving better result than global fit of multiple signals from one NMR titration therefore the results gained from different signals vary.
		Results for H1:	δ(G)	8.8945	ppm	Results for H2:	δ(G)	7.7067	ppm
			Δδ(G)	0	ppm		Δδ(G)	0	ppm
			δ(HG)	8.8244	ppm		δ(HG)	7.693	ppm
			Δδ(HG)	0.0004	ppm		Δδ(HG)	0.0009	ppm
			δ(HG2)	8.771	ppm		δ(HG2)	7.666	ppm
			Δδ(HG2)	0.004	ppm		Δδ(HG2)	0.014	ppm
			δ(HG3)	8.627	ppm		δ(HG3)	7.6	ppm
			Δδ(HG3)	0.014	ppm		Δδ(HG3)	0.3	ppm
			K1	5000	M-1		K1	5200	M-1
			ΔK1	200	M-1		ΔK1	2400	M-1
			K2	1900	M-1		K2	1200	M-1
			ΔK2	200	M-1		ΔK2	900	M-1
			K3	190	M-1		K3	250	M-1
			ΔK3	16	M-1		ΔK3	200	M-1

## Sheet: ZnTPP, cycHC6 - NMR3
concentrations				H1
[cycHC6]	[ZnTPP]	CH1	CH2	Hpor	oHph			CH1 fit	CH2 Fit	Hpor
		cycHC6	cycHC6	ZnTPP	ZnTPP		ratio	cycHC6	cycHC6	ZnTPP
0.000557619	0	0.9948	2.7639				0	0.9948	2.7639
0.000557619	5.47094e-05	0.9293	2.7067	8.8405	8.1154		0.0981126	0.928503	2.70541	8.84065
0.000557619	0.000108346	0.8636	2.6492	8.8389	8.1133		0.194301	0.864747	2.64921	8.83899
0.000557619	0.000160941	0.8028	2.5963	8.8374	8.1116		0.288622	0.803466	2.59522	8.83748
0.000557619	0.000212525	0.7459	2.5433	8.836	8.1097		0.38113	0.744593	2.54338	8.83611
0.000557619	0.000263126	0.6891	2.4949	8.8348	8.1081		0.471875	0.68806	2.49364	8.83485
0.000557619	0.000312773	0.6342	2.446	8.8336	8.1065		0.560908	0.633795	2.44591	8.83371
0.000557619	0.000456247	0.4863	2.3164	8.8303	8.1024		0.818205	0.483883	2.31417	8.83082
0.000557619	0.000547587	0.3929	2.235	8.8286	8.0999		0.982009	0.393934	2.23519	8.82929
0.000557619	0.000635694	0.3091	2.1613	8.8271	8.0979		1.14002	0.311283	2.16266	8.82801
0.000557619	0.000762159	0.1985	2.0631	8.8254	8.0955		1.36681	0.199715	2.0648	8.8265
0.000557619	0.000920942	0.0704	1.9517	8.8238	8.093		1.65156	0.0712185	1.95215	8.82512
0.000557619	0.00110513	-0.061	1.8345	8.8228	8.0911		1.98187	-0.0624225	1.83505	8.82415
0.000557619	0.00137103	-0.2271	1.6893	8.8225	8.0897		2.45872	-0.228814	1.68928	8.82376
0.000557619	0.00163435	-0.3666	1.5673	8.8232	8.0896		2.93094	-0.366963	1.56821	8.82428
0.000557619	0.00193757	-0.502	1.4576	8.8246	8.0903		3.47471	-0.499295	1.4521	8.8256
0.000557619	0.00221026	-0.5979	1.3619	8.8267	8.0918		3.96375	-0.598746	1.36464	8.82718
0.000557619	0.00276283	-0.7573	1.2231	8.8309	8.0954		4.95468	-0.758141	1.22369	8.83085
0.000557619	0.00331539	-0.8782	1.1168	8.8356	8.0997		5.94562	-0.877749	1.11682	8.83459
Comment 1: every signal of cycHC6 was fitted separately
Comment 2: chemical shifts of ZnTPP signal H1 from titrations "ZnTPP, cycHC6 - NMR1"; "ZnTPP, cycHC6 - NMR2" and "ZnTPP, cycHC6 - NMR3" were combined and used together during the data analysis to obtain more stable fit. This approach was giving better result than global fit of multiple signals from one NMR titration therefore the results gained from different signals vary.
		cycHC6 CH1	cycHC6 CH2
Results:	δ(HG3)	-1.69	0.3	ppm		Results for ZnTPP H1:	δ(G)	8.8945	ppm
	∆δ(HG3)	0.1	0.3	ppm			Δδ(G)	0	ppm
	K1	5700	4900	M-1			δ(HG)	8.8244	ppm
	∆K1	900	2000	M-1			Δδ(HG)	0.0004	ppm
	K2	1390	1200	M-1			δ(HG2)	8.771	ppm
	∆K2	120	300	M-1			Δδ(HG2)	0.004	ppm
	K3	260	200	M-1			δ(HG3)	8.627	ppm
	∆K3	60	150	M-1			Δδ(HG3)	0.014	ppm
							K1	5000	M-1
comment: every signal was fitted separately							ΔK1	200	M-1
							K2	1900	M-1
							ΔK2	200	M-1
							K3	190	M-1
							ΔK3	16	M-1

[truncated: 9 more sheets: ZnTPP, cycHC6 - Abs, ZnOEP, cycHC8 - NMR, ZnOEP, cycHC8 - Abs, ZnOEP, cycHC6 - NMR, ZnOEP, cycHC6 - Abs, ZnTPP, M1 - NMR, ZnTPP, M1 - Abs, ZnOEP, M1 - Abs, ZnTPP, cycHC6 - NMR, Job plot]
